# Supplementary material for: Novel nitrogen-doped carbon-coated SnSe2 based on a post-synthetically modified MOF as a high-performance anode material for LIBs and SIBs
Source: Royal Society of Chemistry journal article supplement (doi:10.1039/d4nr02418d), 2024-01-01
Supplement: d4nr02418d1.pdf [file d4nr02418d1.pdf]

# **A novel nitrogen-doped carbon-coated SnSe<sub>2</sub> based on post-synthetic modified MOF as high-performance anode materials for LIBs and SIBs**

Zhiyuan Chen<sup>a</sup>, Zhe Zhang<sup>a</sup>, Longzhen Wang<sup>a</sup>, Yifei Li<sup>a</sup>, Yiting Wang<sup>a</sup>, Yichuan Rui<sup>a</sup>, Ailing Song<sup>\*b</sup>, Min Li<sup>c</sup>, Yinyu Xiang<sup>d</sup>, Kaibin Chu<sup>e</sup>, Lei Jiang<sup>\*f</sup>, Bohejin Tang<sup>\*a</sup>, Ning Han<sup>g</sup>, Guoxiu Wang<sup>h</sup>, Hao Tian<sup>\*h</sup>

a. College of Chemistry and Chemical Engineering, Shanghai University of Engineering Science, Shanghai 201620, People's Republic of China. E-mail: tangbohejin@sues.edu.cn

b. College of Environmental and Chemical Engineering, Yanshan University, Qinhuangdao, China. E-mail: ailing.song@ysu.edu.cn

c. Department of Industrial Chemistry, University of Bologna, Viale Risorgimento 4, 40136 Bologna, Italy

d. School of Chemistry, Chemical Engineering and Life Sciences, Wuhan University of Technology, Wuhan 430070

e. School of Materials Science and Engineering, Linyi University, Linyi, 276000 P. R. China

f. Department of Chemical Engineering, KU Leuven, Celestijnenlaan 200F, B-3001 Heverlee, Belgium. E-mail: lei.jiang@kuleuven.be

g. Department of Materials Engineering, KU Leuven, Leuven, 3001, Belgium

h. Centre for Clean Energy Technology, School of Mathematical and Physical Sciences, Faculty of Science, University of Technology Sydney, Broadway, Sydney, NSW, 2007, Australia. E-mail: Hao.tian@uts.edu.au

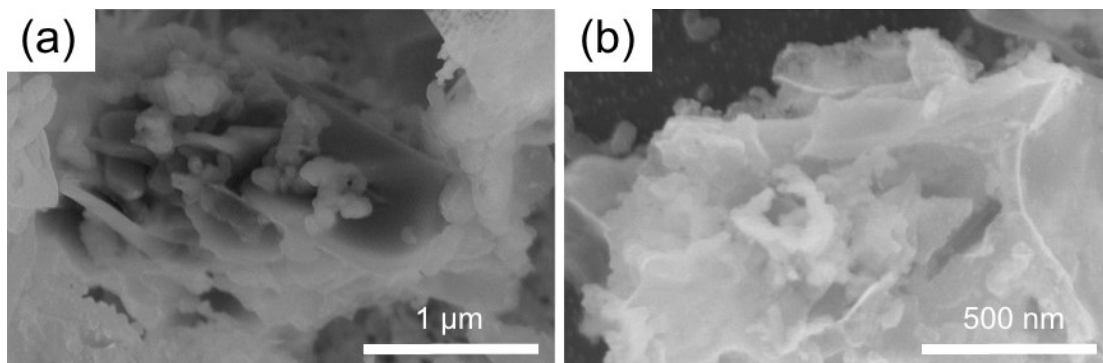

**Fig. S1** The SEM images of SnSe<sub>2</sub>/C-N after 100 cycles of charge/discharge in LIBs.

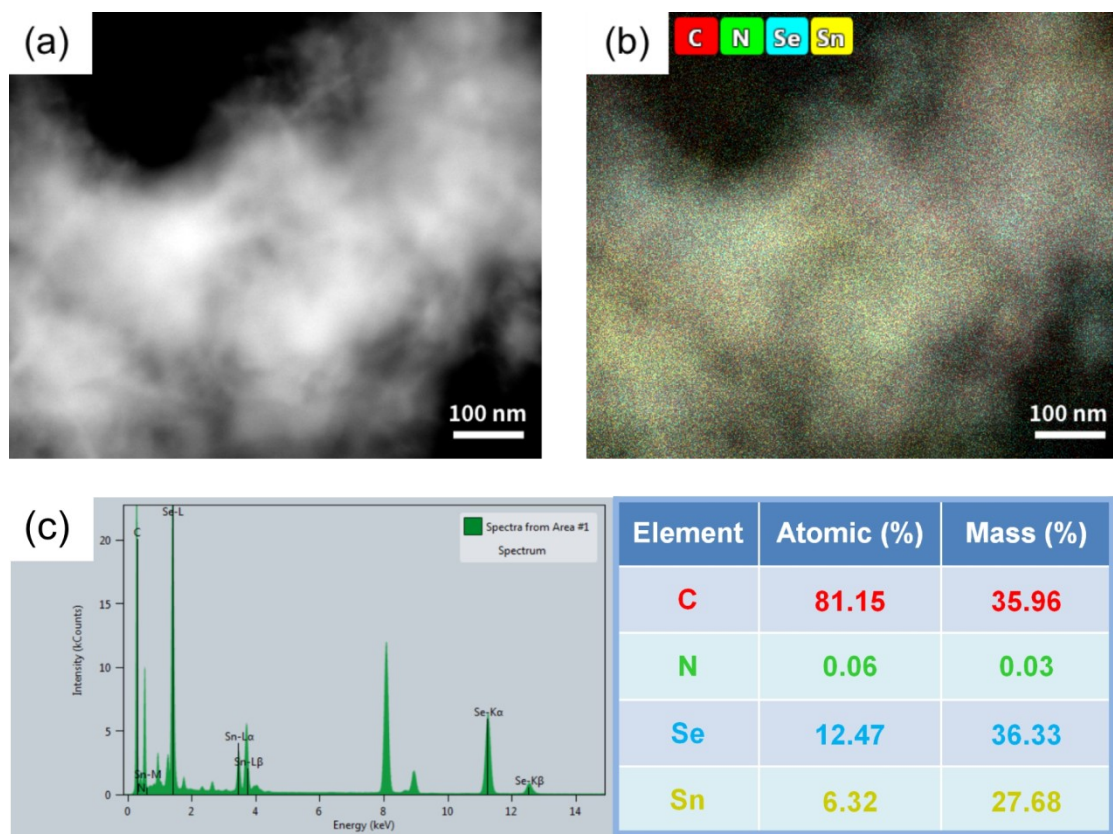

**Fig. S2** EDS mapping images for SnSe<sub>2</sub>/C-N: (a) HAADF image; (b) all elements labeled image; and (c) all elements' EDS spectra.

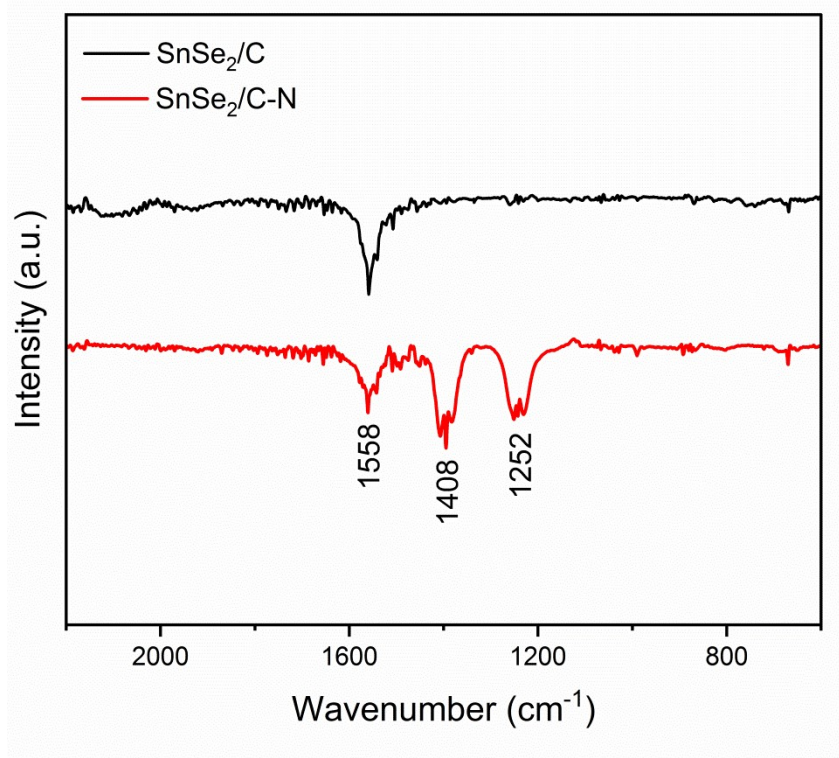

**Fig. S3** Comparison of FT-IR of  $\text{SnSe}_2/\text{C}$  and  $\text{SnSe}_2/\text{C-N}$ .

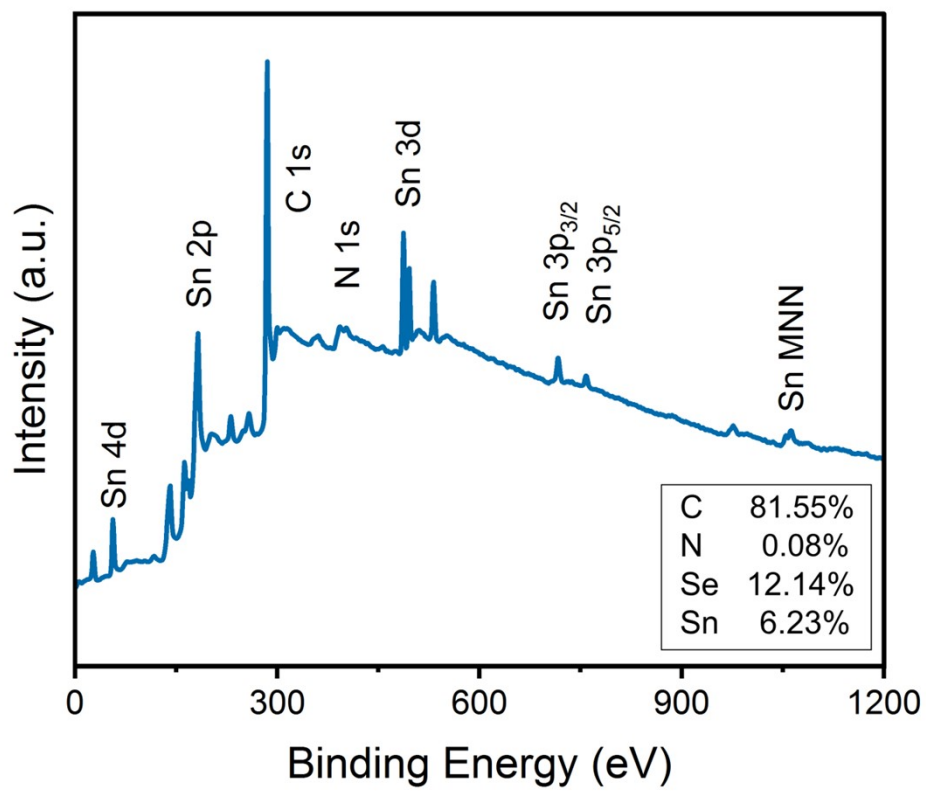

**Fig. S4** The XPS spectra of the SnSe<sub>2</sub>/C-N composite.

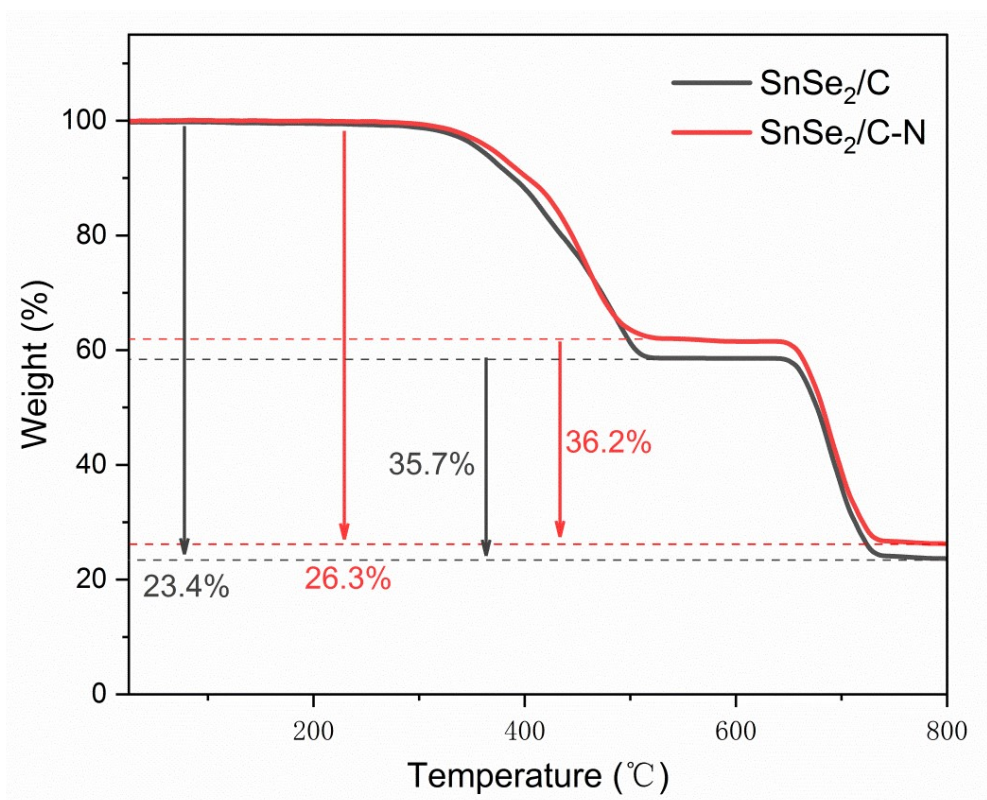

**Fig. S5** Thermogravimetric analysis patterns of SnSe<sub>2</sub>/C and SnSe<sub>2</sub>/C-N.

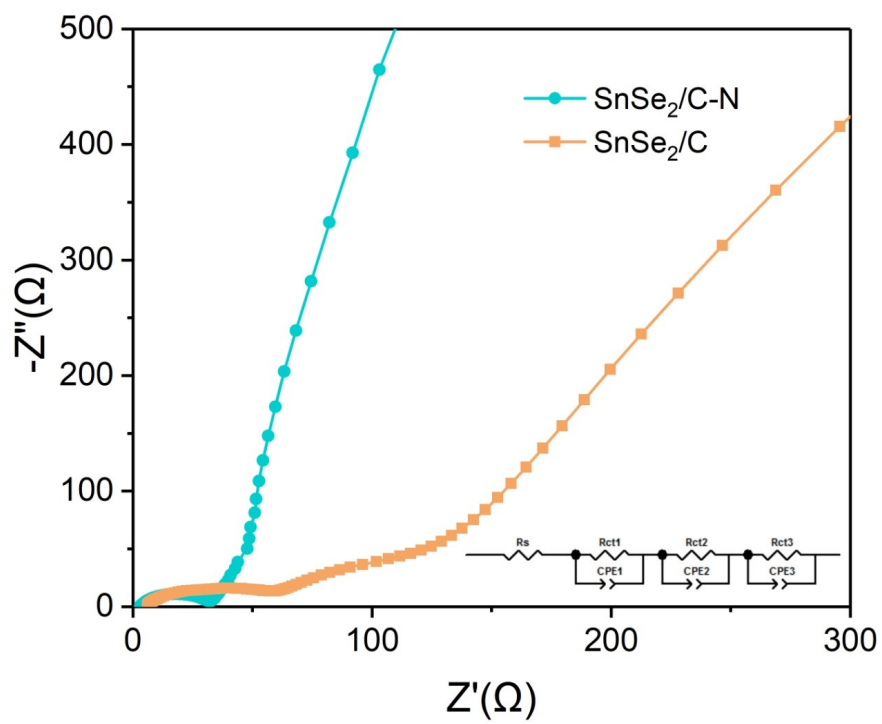

**Fig. S6** EIS of SnSe<sub>2</sub>/C and SnSe<sub>2</sub>/C-N electrodes for LIBs.

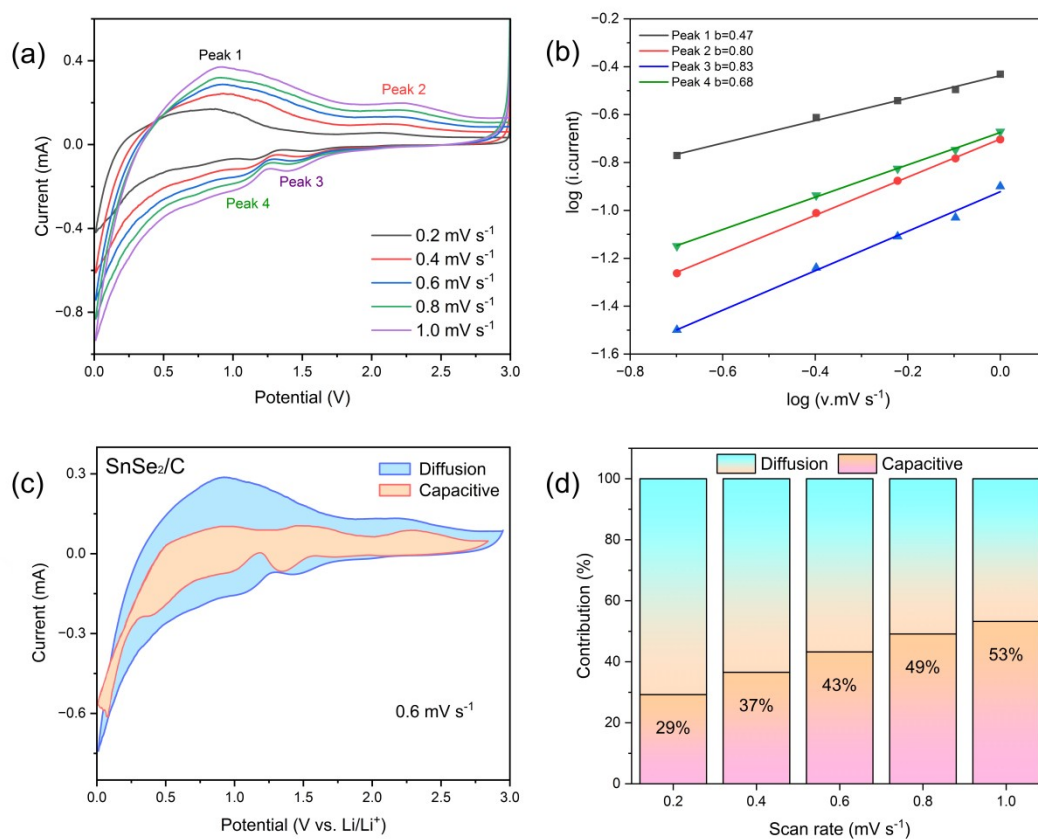

**Fig. S7** (a) CV curves of SnSe<sub>2</sub>/C for different scan rates (0.2-1.0 mV s<sup>-1</sup>), (b) log (scan rate) /log (current) plots, (c) Contribution of pseudocapacitive (orange area) at 0.6 mV s<sup>-1</sup>, and (d) Histogram of the pseudocapacitive contributions at different scan rates.
